# Supplementary material for: Links between Genetic Groups, Indole Alkaloid Profiles and Ecology within the Grass-Parasitic Claviceps purpurea Species Complex
Source: Toxins (Basel). 2015 Apr 28;7(5):1431–56. doi: 10.3390/toxins7051431 (PMC4448156; doi:10.3390/toxins7051431)
Supplement: Supplementary file 1 [file toxins-07-01431-s001.pdf]

# Supplementary Information

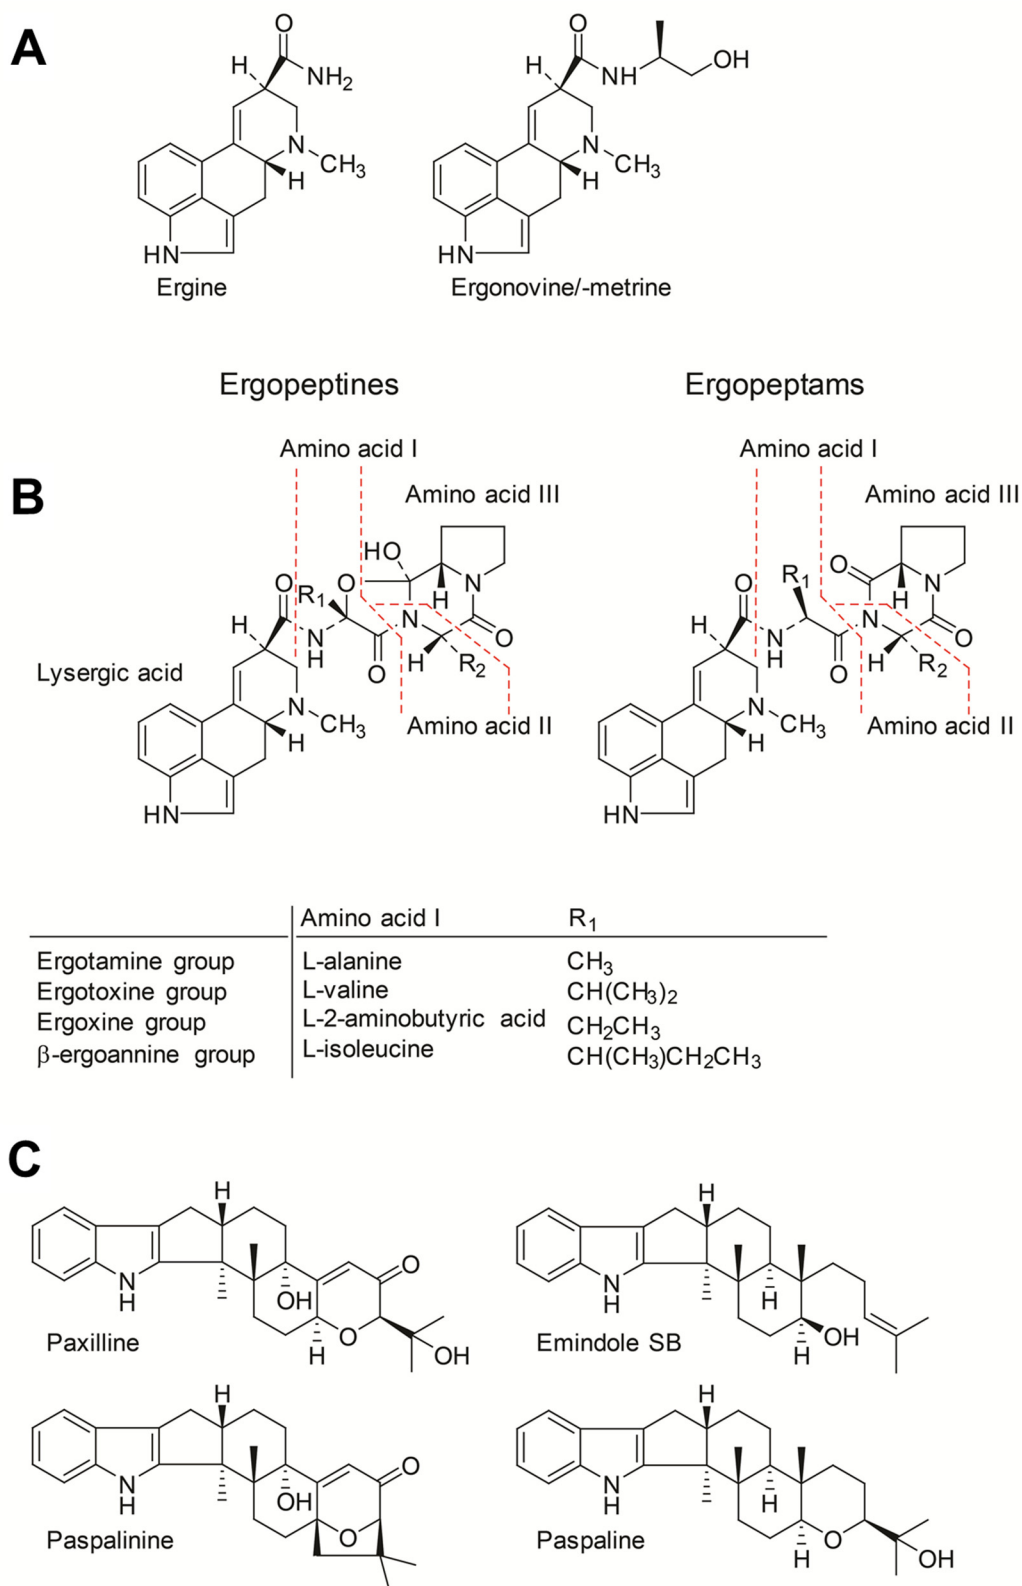

**Figure S1.** Examples of structures for ergot alkaloids and indole-diterpenes: ergine and ergonovine (A), ergopeptines and ergopeptams (B), examples of *Claviceps*-related indole-diterpenes (C).

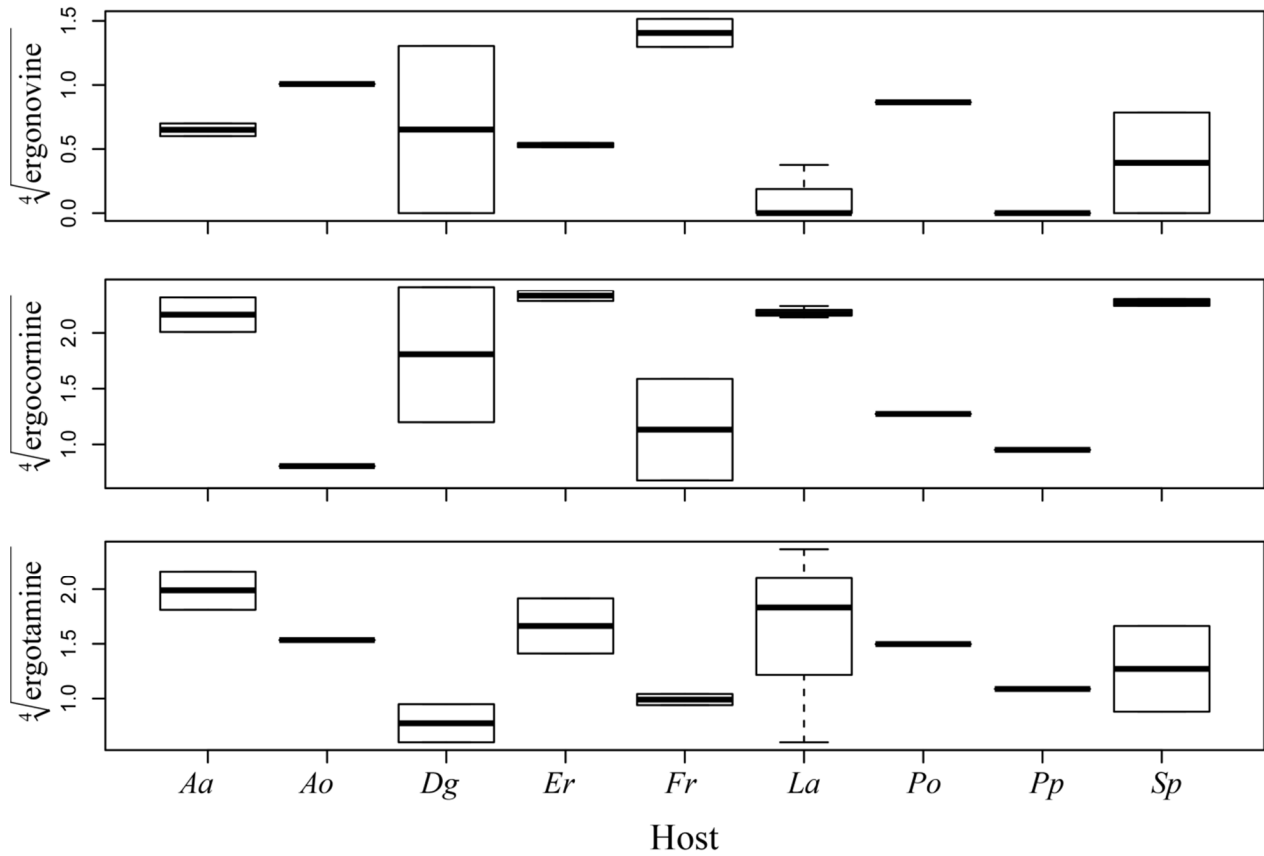

**Figure S2.** Differences in ergot-alkaloid composition in *Claviceps purpurea sensu stricto* (G1) sclerotia from different hosts. Substantial (but not significant) differences in relative amounts between hosts were observed for ergonovine, ergocornine and ergotamine. Host abbreviations: Aa = *Ammophila arenaria*, Ao = *Anthoxanthum odoratum*, Dg = *Dactylis glomerata*, Er = *Elymus repens*, Fr = *Festuca rubra*, La = *Leymus arenarius*, Po = *Poa pratensis*, Pp = *Phleum pratense*, Sp = *Schedonorus pratensis*.
